# Supplementary material for: Afternoon Napping Durations in Chinese Population Over 60 Years Old: Longitudinal Associations With Cognitive Performance
Source: PubMed Central journal article supplement (PMC9302202; doi:10.3389/fpubh.2022.911498), 2022-07-07
Supplement: Data_Sheet_1.pdf [file Data_Sheet_1.pdf]

## Supplemental files1

Supplemental Table 1. Definitions of variables used

Supplemental Table 2. Correlations of daytime napping with cognitive performance in Chinese elderly persons at each time point during 2011-2018.

Supplemental Table 3. Characteristics of naptime variation grouping among participants whose durations were 30-90 minutes at baseline included in GLMs

Supplemental Table 4. Supplemental Table 4. Characteristics of naptime variation grouping among participants whose napping =0, <30 minutes or >90 minutes at baseline included in GLMs

Supplemental Table 5. Associations between baseline daytime napping and longitudinal global cognition according to generalized estimating equations (GEE) between male and female.

Supplementary Figure 1. Plots of estimated smooth function of napping duration in Wave 1 with 95% confidence intervals for the GAM when the response variable was global cognition in Wave 4.

Supplemental Table 1. Definitions of variables used

| Baseline characteristics                    | Wave                 | Definition                                                                                                                     |
|---------------------------------------------|----------------------|--------------------------------------------------------------------------------------------------------------------------------|
| Time-invariant                              | Wave 1 (2011-2012)   |                                                                                                                                |
| Age                                         |                      | Continuous                                                                                                                     |
| Gender                                      |                      | Male=1, Female=2                                                                                                               |
| BMI                                         |                      | Continuous                                                                                                                     |
| High level of education                     |                      | Low levels of education (without high school education or further study) =0, high levels of education (high school or more) =1 |
| Smoking                                     |                      | Yes = 1, no = 2                                                                                                                |
| Current alcohol use                         |                      | Drinking at least once per week over the previous year = 1, no = 2                                                             |
| Hypertension                                |                      | Yes = 1, no = 2                                                                                                                |
| Dyslipidemia                                |                      | Yes = 1, no = 2                                                                                                                |
| Diabetes or high blood sugar                |                      | Yes = 1, no = 2                                                                                                                |
| Cancer                                      |                      | Yes = 1, no = 2                                                                                                                |
| Chronic lung diseases                       |                      | Yes = 1, no = 2                                                                                                                |
| Liver disease                               |                      | Yes = 1, no = 2                                                                                                                |
| Heart problems                              |                      | Yes = 1, no = 2                                                                                                                |
| Stroke                                      |                      | Yes = 1, no = 2                                                                                                                |
| Kidney disease                              |                      | Yes = 1, no = 2                                                                                                                |
| Stomach or other digestive disease          |                      | Yes = 1, no = 2                                                                                                                |
| Emotional, nervous, or psychiatric problems |                      | Yes = 1, no = 2                                                                                                                |
| Memory-related disease                      |                      | Yes = 1, no = 2                                                                                                                |
| Arthritis or rheumatism                     |                      | Yes = 1, no = 2                                                                                                                |
| Asthma                                      |                      | Yes = 1, no = 2                                                                                                                |
| Vigorous physical activities                |                      | More than 10 minutes per week = 1, less than 10 minutes per week = 0                                                           |
| Moderate physical activities                |                      | More than 10 minutes per week = 1, less than 10 minutes per week = 1                                                           |
| Walking                                     |                      | More than 10 minutes per week = 1, less than 10 minutes per week = 2                                                           |
| Depression                                  |                      | without depression symptoms =0, defined as depression symptoms =1                                                              |
| Taking sleeping pills                       |                      | Yes = 1, no = 0                                                                                                                |
| Time-variant                                | Wave 1-4 (2011-2018) |                                                                                                                                |
| Cognitive performance score                 |                      | Continuous variable ranging from 0 to 31                                                                                       |
| Napping                                     |                      | Continuous                                                                                                                     |

Abbreviation: BMI, Body mass index

Supplemental Table 2. Correlations of daytime napping with cognitive performance in Chinese elderly persons at each time point during 2011-2018.

|         | NP2011             | NP2013             | NP2015             | NP2018             | Cog2011            | Cog2013            | Cog2015            | Cog2018 |
|---------|--------------------|--------------------|--------------------|--------------------|--------------------|--------------------|--------------------|---------|
| NP2011  | 1                  |                    |                    |                    |                    |                    |                    |         |
| NP2013  | 0.425 <sup>a</sup> | 1                  |                    |                    |                    |                    |                    |         |
| NP2015  | 0.460 <sup>a</sup> | 0.486 <sup>a</sup> | 1                  |                    |                    |                    |                    |         |
| NP2018  | 0.374 <sup>a</sup> | 0.384 <sup>a</sup> | 0.438 <sup>a</sup> | 1                  |                    |                    |                    |         |
| Cog2011 | 0.069 <sup>a</sup> | 0.053 <sup>a</sup> | 0.047 <sup>a</sup> | 0.044 <sup>a</sup> | 1                  |                    |                    |         |
| Cog2013 | 0.069 <sup>a</sup> | 0.057 <sup>a</sup> | 0.047 <sup>a</sup> | 0.036 <sup>b</sup> | 0.622 <sup>a</sup> | 1                  |                    |         |
| Cog2015 | 0.072 <sup>a</sup> | 0.055 <sup>a</sup> | 0.039 <sup>b</sup> | 0.037 <sup>b</sup> | 0.631 <sup>a</sup> | 0.685 <sup>a</sup> | 1                  |         |
| Cog2018 | 0.056 <sup>a</sup> | 0.049 <sup>a</sup> | 0.022              | 0.022              | 0.615 <sup>a</sup> | 0.664 <sup>a</sup> | 0.717 <sup>a</sup> | 1       |

Abbreviations: NP Napping, Cog Cognition.

<sup>a</sup> P < 0.01

<sup>b</sup> P < 0.05

Supplemental Table 3. Characteristics of naptime variation grouping among participants whose durations were 30-90 minutes at baseline included in GLMs

|                                         | Variations in nap duration |                      |              |                      |                      |
|-----------------------------------------|----------------------------|----------------------|--------------|----------------------|----------------------|
|                                         | Decreased by > 0.5 h       | Decreased by 0-0.5 h | No change    | Increased by 0-0.5 h | Increased by > 0.5 h |
| Global cognition in Wave 2 <sup>a</sup> |                            |                      |              |                      |                      |
| Number of participants                  | 299                        | 155                  | 294          | 124                  | 160                  |
| Cognition mean (SD) score               | 11.78 (6.40)               | 12.37 (6.64)         | 13.67 (6.39) | 12.69 (7.44)         | 12.74 (6.94)         |
| Global cognition in Wave 3 <sup>b</sup> |                            |                      |              |                      |                      |
| Number of participants                  | 275                        | 146                  | 313          | 131                  | 167                  |
| Cognition mean (SD) score               | 11.08 (6.40)               | 11.43 (7.00)         | 12.37 (6.41) | 11.92 (7.01)         | 10.92 (6.34)         |
| Global cognition in Wave 4 <sup>c</sup> |                            |                      |              |                      |                      |
| Number of participants                  | 287                        | 134                  | 304          | 121                  | 186                  |
| Cognition mean (SD) score               | 8.32 (7.60)                | 11.43 (7.81)         | 10.15 (7.41) | 11.06 (7.08)         | 7.63 (7.04)          |

<sup>a</sup> Change in napping presented the variations between napping in wave 2 and napping at baseline, being divided into 5 groups: decreased >0.5h/d, decrease 0-0.5h/d, no change, increased 0-0.5 h/d, and increased >0.5h/d, the GLMs showed the associations between this change in napping and global cognition scores in wave 2.

<sup>b</sup> Change in napping presented the variations between napping in wave 3 and napping at baseline, being divided into 5 groups: decreased >0.5h/d, decrease 0-0.5h/d, no change, increased 0-0.5 h/d, and increased >0.5h/d, the GLMs showed the associations between this change in napping and global cognition scores in wave 3.

<sup>c</sup> Change in napping presented the variations between napping in wave 4 and napping at baseline, being divided into 5 groups: decreased >0.5h/d, decrease 0-0.5h/d, no change, increased 0-0.5 h/d, and increased >0.5h/d, the GLMs showed the associations between this change in napping and global cognition scores in wave 4.

Supplemental Table 4. Characteristics of naptime variation grouping among participants whose napping =0, <30 minutes or >90 minutes at baseline included in GLMs

|                           | Excessive <sup>a</sup> | No change <sup>b</sup> | Benefit 1 <sup>c</sup> | Benefit 2 <sup>d</sup> | Benefit 3 <sup>e</sup> |
|---------------------------|------------------------|------------------------|------------------------|------------------------|------------------------|
| No napping in Wave 1      |                        |                        |                        |                        |                        |
| Number of participants    | 770                    | 678                    | 254                    | 92                     | 47                     |
| Cognition mean (SD) score | 7.83 (7.02)            | 8.64 (6.92)            | 8.00 (7.00)            | 9.52 (7.80)            | 8.57 (7.40)            |
| Short napping in Wave 1   |                        |                        |                        |                        |                        |
| Number of participants    | 456                    | 40                     | 71                     | 59                     | 40                     |
| Cognition mean (SD) score | 8.70 (7.22)            | 12.25 (7.19)           | 14.11 (8.08)           | 9.85 (7.68)            | 13.47 (8.61)           |
| Long napping in Wave 1    |                        |                        |                        |                        |                        |
| Number of participants    | 66                     | 279                    | 70                     | 40                     | 26                     |
| Cognition mean (SD) score | 8.63 (7.31)            | 9.35 (7.02)            | 8.90 (7.42)            | 10.20 (7.41)           | 10.81 (8.21)           |

<sup>a</sup> Excessive, for participants with No napping in Wave 1, they were divided into Excessive group as long as they were in No or Long napping group once from Wave 2 to Wave 4; for participants with Short napping

at baseline, they were divided into Excessive group as long as they were in No or Long napping group once from Wave 2 to Wave 4; for participants with Long napping at baseline, they were divided into Excessive group as long as they were in No or Long napping group once from Wave 2 to Wave 4

<sup>b</sup> No change, for participants with No napping in Wave 1, they were divided into No change group if they maintained in No napping group from Wave 2 to Wave 4; for participants with Short napping at baseline, they were divided into No change group if they maintained in Short napping group once from Wave 2 to Wave 4; for participants with Long napping at baseline, they were divided into No change group if they maintained in Long napping group once from Wave 2 to Wave 4

<sup>c</sup> Benefit 1, for participants with No napping in Wave 1, they were divided into Benefit 1 group if they maintained No napping in two waves and had an Moderate napping in another wave; for participants with Short napping at baseline, they were divided into Benefit 1 group if they maintained Short napping in two waves and had an Moderate napping in another wave; for participants with Long napping at baseline, they were divided into Benefit 1 group if they maintained an Long napping in two waves and had an Moderate napping in another wave

<sup>d</sup> Benefit 2, for participants with No napping in Wave 1, they were divided into Benefit 2 group if they maintained in No napping group for one wave and in Moderate napping group for other two waves; for participants with Short napping at baseline, they were divided into Benefit 2 group if they maintained an Short napping in one wave and had two Moderate napping in other two waves; for participants with Long napping at baseline, they were divided into Benefit 2 group if they maintained an Long napping in one wave and had two Moderate napping in other two waves

<sup>e</sup> Benefit 3, for participants with No napping in Wave 1, they were divided into Benefit 3 group if they maintained in Moderate napping in three waves; for participants with Short napping at baseline, they were divided into Benefit 3 group if they Moderate napping in three waves; for participants with Long napping at baseline, they were divided into Benefit 3 group if they Moderate napping in three waves

Supplemental Table 5. Associations between baseline daytime napping and longitudinal global cognition according to generalized estimating equations (GEE) between male and female.

|                     | Unstandardized $\beta$ coefficient (95% confidence interval) |                                |                        |                                |
|---------------------|--------------------------------------------------------------|--------------------------------|------------------------|--------------------------------|
|                     | Model 1                                                      |                                | Model 2                |                                |
|                     | Male (1949)                                                  | Female (2075)                  | Male (1949)            | Female (2075)                  |
| Categorical trend 1 |                                                              |                                |                        |                                |
| No napping          | Ref.                                                         | Ref.                           | Ref.                   | Ref.                           |
| Short napping       | 0.351 (-0.316, 1.019)                                        | <b>2.011 (1.346, 2.675)***</b> | 0.275 (-0.346, 0.896)  | <b>1.326 (0.661, 1.990)***</b> |
| Moderate napping    | 0.768 (0.223, 1.312)**                                       | <b>0.651 (0.071, 1.231)*</b>   | 0.436 (-0.082, 0.953)  | -0.023 (-0.887, 0.841)         |
| Long napping        | -0.072 (-0.724, 0.579)                                       | 0.601 (-0.209, 1.411)          | -0.089 (-0.695, 0.517) | 0.270 (-0.868, 1.409)          |
| Categorical trend 2 |                                                              |                                |                        |                                |
| No napping          | Ref.                                                         | Ref.                           | Ref.                   | Ref.                           |
| Napping             | 0.455 (0.001, 0.909)                                         | <b>1.130 (0.669, 1.591)***</b> | 0.267 (-0.160, 0.694)  | 0.459 (-0.025, 0.943)          |

\*\*\*P<0.001; \*\*P<0.01; \*P<0.05

Model 1: adjusted for age.

Model 2: adjusted for Model 1+ educational levels, physical activities, BMI, depression, use of tranquilizers, smoking, alcohol consumption, night sleep duration at baseline, medical history including hypertension, dyslipidemia, heart disease and other 11 chronic diseases.

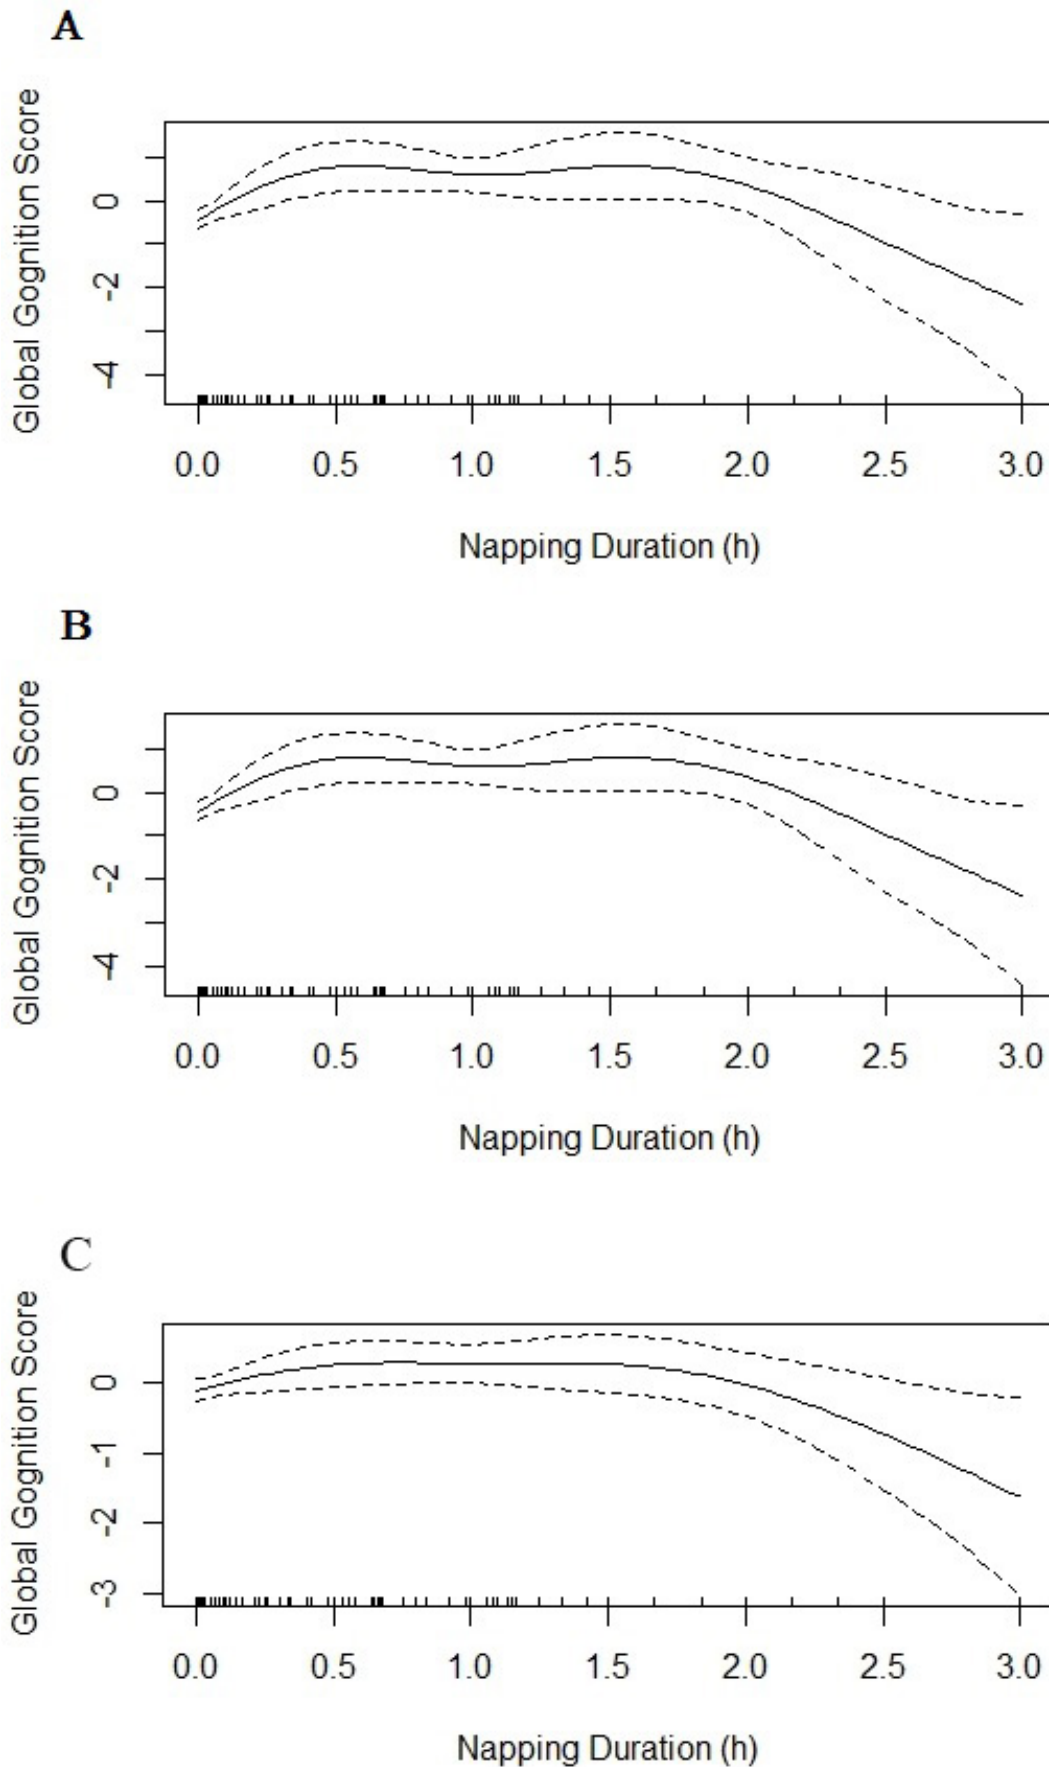

Supplementary Figure 1. Plots of estimated smooth function of napping duration in Wave 1 with 95% confidence intervals for the GAM when the response variable was global cognition in Wave 4. The range between the dashed lines indicates the 95% confidence interval of the estimated smooth function, and the solid lines indicate the estimated smooth function of napping duration in Wave 1 for the GAM. (A) Model 0 showed a univariate smooth function of napping duration (EDF =

3.754,  $P < 0.001$ ). (B) Model 1 presented a multivariable smooth function of napping duration, adjusted for age and sex (EDF = 4,217,  $P < 0.001$ ). (X) Model 2 presented a multivariable smooth function of napping duration, adjusted for age, sex educational levels, physical activities, BMI, depression, use of tranquilizers, smoking, alcohol consumption, night sleep duration at baseline, medical history including hypertension, dyslipidemia, heart disease and other 11 chronic diseases (EDF = 2.843,  $P = 0.046$ ).
